# Supplementary material for: Integrated analysis and validation of the TRIM28-H2AX-CDK4 diagnostic model assists to predict the progression of HCC
Source: publisher site journal article supplement (doi:10.18632/aging.205137), 2023-10-20
Supplement: Supplementary file [file aging-v15i24-205137-supplementary-material-SD2.pdf]

## SUPPLEMENTARY TABLES

**Supplementary Table 1. The reference information of CpGs.**

| Name       | R<br>(copy number) | HR    | CI             | P value | CHR | UCSC_RefGene_<br>Group | Relation_to_UCSC_<br>CpG_Island |
|------------|--------------------|-------|----------------|---------|-----|------------------------|---------------------------------|
| cg05663122 | -0.050             | 1.908 | (1.221, 2.981) | 0.005   | 19  | TSS200                 | Island                          |
| cg05025162 | 0.127              | 1.673 | (1.185, 2.362) | 0.003   | 19  | Body                   | S_Shore                         |
| cg26981251 | -0.003             | 1.59  | (1.118, 2.261) | 0.010   | 19  | TSS1500                | Island                          |
| cg24109975 | 0.030              | 1.522 | (1.071, 2.164) | 0.019   | 19  | TSS200                 | Island                          |
| cg12528394 | -0.069             | 1.481 | (1.046, 2.096) | 0.027   | 19  | 1stExon                | Island                          |
| cg01339029 | 0.090              | 1.373 | (0.899, 2.097) | 0.142   | 19  | TSS1500                | Island                          |
| cg11909976 | -0.170             | 1.205 | (0.777, 1.868) | 0.405   | 19  | TSS200                 | Island                          |
| cg19476058 | -0.230             | 1.124 | (0.745, 1.693) | 0.578   | 19  | Body                   | S_Shelf                         |
| cg17840453 | -0.065             | 1.121 | (0.782, 1.605) | 0.535   | 19  | TSS200                 | Island                          |
| cg18397137 | -0.099             | 1.093 | (0.77, 1.55)   | 0.619   | 19  | 1stExon;5'UTR          | Island                          |
| cg06180363 | 0.113              | 0.829 | (0.588, 1.17)  | 0.286   | 19  | 1stExon                | Island                          |
| cg05678175 | -0.205             | 0.677 | (0.479, 0.959) | 0.028   | 19  | Body                   | S_Shore                         |

**Supplementary Table 2. Prognostic summary of immune checkpoints.**

| Checkpoint | Expression | OS      | p-Value | HR<br>(high) | RFS     | p-Value | HR<br>(high) | PFS     | p-Value | HR<br>(high) | DSS     | p-Value | HR<br>(high) |
|------------|------------|---------|---------|--------------|---------|---------|--------------|---------|---------|--------------|---------|---------|--------------|
| CTLA4      | Up         | Ns      | 0.201   | 0.79         | Favor   | 0.018   | 0.65         | Favor   | 0.04    | 0.71         | Ns      | 0.309   | 0.78         |
| PD1        | Up         | Ns      | 0.223   | 1.24         | Unfavor | 0.029   | 1.47         | Unfavor | 0.016   | 1.47         | Ns      | 0.156   | 1.45         |
| TIM3       | Up         | Ns      | 0.226   | 1.28         | Favor   | 0.02    | 0.66         | Favor   | 0.02    | 0.7          | Ns      | 0.342   | 0.79         |
| TIGIT      | Up         | Ns      | 0.067   | 0.71         | Favor   | 0.001   | 0.58         | Favor   | 0.002   | 0.6          | Favor   | 0.044   | 0.62         |
| CD8A       | Ns         | Favor   | 0.001   | 0.56         | Favor   | 0.001   | 0.57         | Favor   | <0.001  | 0.57         | Favor   | 0.001   | 0.48         |
| CD8B       | Up         | Favor   | 0.006   | 0.6          | Favor   | 0.001   | 0.57         | Favor   | 0.001   | 0.58         | Favor   | 0.008   | 0.52         |
| CD27       | Up         | Favor   | 0.006   | 0.59         | Favor   | 0.007   | 0.58         | Favor   | 0.003   | 0.59         | Favor   | 0.019   | 0.59         |
| CD96       | Up         | Favor   | 0.001   | 0.56         | Favor   | <0.001  | 0.49         | Favor   | <0.001  | 0.51         | Favor   | 0.001   | 0.45         |
| CD40LG     | Up         | Favor   | 0.006   | 0.6          | Favor   | 0.001   | 0.55         | Favor   | 0.004   | 0.65         | Favor   | 0.006   | 0.53         |
| TNFRSF4    | Up         | Unfavor | <0.001  | 2.08         | Unfavor | 0.005   | 1.67         | Unfavor | 0.015   | 1.48         | Unfavor | <0.001  | 2.59         |
| ADORA2A    | Down       | Favor   | 0.006   | 0.59         | Favor   | 0.009   | 0.65         | Favor   | 0.035   | 0.73         | Favor   | 0.025   | 0.59         |
| CD33       | Down       | Favor   | 0.041   | 0.7          | Favor   | 0.006   | 0.63         | Favor   | 0.003   | 0.64         | Favor   | 0.025   | 0.6          |
| KLRC1      | Down       | Favor   | 0.008   | 0.61         | Favor   | 0.001   | 0.55         | Favor   | 0.008   | 0.65         | Favor   | 0.034   | 0.61         |
| LAG3       | Down       | Favor   | 0.022   | 0.6          | Favor   | 0.016   | 0.67         | Favor   | 0.007   | 0.66         | Ns      | 0.162   | 0.68         |
| PD-L1      | Down       | Ns      | 0.095   | 0.71         | Ns      | 0.234   | 0.81         | Ns      | 0.266   | 0.84         | Ns      | 0.096   | 0.64         |
| Siglec7    | Down       | Ns      | 0.146   | 0.77         | Favor   | 0.003   | 0.61         | Favor   | 0.001   | 0.61         | Ns      | 0.078   | 0.66         |
| Siglec9    | Down       | Ns      | 0.201   | 1.25         | Favor   | 0.028   | 0.67         | Favor   | 0.038   | 0.69         | Ns      | 0.42    | 0.81         |

**Supplementary Table 3. Mutual Exclusivity.**

| A      | B              | Neither | A Not B | B Not A | Both | Log <sub>2</sub><br>odds ratio | p-Value | q-Value          | Tendency           | Significance |
|--------|----------------|---------|---------|---------|------|--------------------------------|---------|------------------|--------------------|--------------|
| TRIM28 | <b>SIGLEC7</b> | 852     | 8       | 3       | 4    | >3                             | <0.001  | <b>&lt;0.001</b> | Co-occurrence      | <b>Yes</b>   |
| TRIM28 | <b>CD33</b>    | 852     | 9       | 3       | 3    | >3                             | <0.001  | <b>0.001</b>     | Co-occurrence      | <b>Yes</b>   |
| TRIM28 | <b>SIGLEC9</b> | 849     | 9       | 6       | 3    | >3                             | <0.001  | <b>0.004</b>     | Co-occurrence      | <b>Yes</b>   |
| TRIM28 | CD8A           | 852     | 11      | 3       | 1    | >3                             | 0.054   | 0.346            | Co-occurrence      | No           |
| TRIM28 | CD40LG         | 852     | 11      | 3       | 1    | >3                             | 0.054   | 0.346            | Co-occurrence      | No           |
| TRIM28 | SPATA2         | 847     | 11      | 8       | 1    | >3                             | 0.118   | 0.697            | Co-occurrence      | No           |
| TRIM28 | TNFRSF4        | 841     | 12      | 14      | 0    | <-3                            | 0.822   | 0.999            | Mutual exclusivity | No           |
| TRIM28 | CD96           | 848     | 12      | 7       | 0    | <-3                            | 0.907   | 0.999            | Mutual exclusivity | No           |
| TRIM28 | LAG3           | 848     | 12      | 7       | 0    | <-3                            | 0.907   | 0.999            | Mutual exclusivity | No           |
| TRIM28 | CTLA4          | 849     | 12      | 6       | 0    | <-3                            | 0.92    | 0.999            | Mutual exclusivity | No           |
| TRIM28 | ADORA2A        | 850     | 12      | 5       | 0    | <-3                            | 0.933   | 0.999            | Mutual exclusivity | No           |
| TRIM28 | HAVCR2         | 851     | 12      | 4       | 0    | <-3                            | 0.946   | 0.999            | Mutual exclusivity | No           |

|        |       |     |    |   |   |     |       |       |                    |    |
|--------|-------|-----|----|---|---|-----|-------|-------|--------------------|----|
| TRIM28 | CD8B  | 851 | 12 | 4 | 0 | <-3 | 0.946 | 0.999 | Mutual exclusivity | No |
| TRIM28 | CD27  | 851 | 12 | 4 | 0 | <-3 | 0.946 | 0.999 | Mutual exclusivity | No |
| TRIM28 | CD274 | 851 | 12 | 4 | 0 | <-3 | 0.946 | 0.999 | Mutual exclusivity | No |
| TRIM28 | TIGIT | 854 | 12 | 1 | 0 | <-3 | 0.986 | 0.999 | Mutual exclusivity | No |
| TRIM28 | KLRC1 | 854 | 12 | 1 | 0 | <-3 | 0.986 | 0.999 | Mutual exclusivity | No |

**Supplementary Table 4. Univariate and multivariate analysis of CDK4 associated with DSS of HCC.**

| Characteristics                                                | Total (N) | Univariate analysis   |         | Multivariate analysis |              |
|----------------------------------------------------------------|-----------|-----------------------|---------|-----------------------|--------------|
|                                                                |           | Hazard ratio (95% CI) | P value | Hazard ratio (95% CI) | P value      |
| T stage (T2 & T3 & T4 vs. T1)                                  | 362       | 2.829 (1.747–4.582)   | <0.001  | 0.284 (0.033–2.449)   | 0.252        |
| Pathologic stage (Stage II & Stage III & Stage IV vs. Stage I) | 341       | 2.909 (1.718–4.925)   | <0.001  | 8.223 (0.921–73.410)  | 0.059        |
| Age (>60 vs. ≤60)                                              | 365       | 0.846 (0.543–1.317)   | 0.458   | 1.013 (0.548–1.873)   | 0.968        |
| BMI (>25 vs. ≤25)                                              | 329       | 0.826 (0.512–1.330)   | 0.431   | 1.414 (0.750–2.664)   | 0.284        |
| Histologic grade (G3 & G4 vs. G1 & G2)                         | 360       | 1.086 (0.683–1.728)   | 0.726   | 1.227 (0.638–2.358)   | 0.540        |
| AFP (ng/ml) (>400 vs. ≤400)                                    | 275       | 0.867 (0.450–1.668)   | 0.668   | 0.426 (0.186–0.977)   | <b>0.044</b> |
| CDK4 (High vs. Low)                                            | 365       | 2.346 (1.479–3.721)   | <0.001  | 3.025 (1.516–6.034)   | <b>0.002</b> |

**Supplementary Table 5. Univariate and multivariate analysis of CDK4 associated with OS of HCC.**

| Characteristics                                                | Total (N) | Univariate analysis   |         | Multivariate analysis |              |
|----------------------------------------------------------------|-----------|-----------------------|---------|-----------------------|--------------|
|                                                                |           | Hazard ratio (95% CI) | P value | Hazard ratio (95% CI) | P value      |
| T stage (T2 & T3 & T4 vs. T1)                                  | 370       | 2.126 (1.481–3.052)   | <0.001  | 0.500 (0.063–3.965)   | 0.512        |
| Pathologic stage (Stage II & Stage III & Stage IV vs. Stage I) | 349       | 2.090 (1.429–3.055)   | <0.001  | 3.606 (0.446–29.136)  | 0.229        |
| Age (>60 vs. ≤60)                                              | 373       | 1.205 (0.850–1.708)   | 0.295   | 1.592 (0.979–2.589)   | 0.061        |
| BMI (>25 vs. ≤25)                                              | 336       | 0.798 (0.550–1.158)   | 0.235   | 1.129 (0.695–1.833)   | 0.624        |
| Histologic grade (G3 & G4 vs. G1 & G2)                         | 368       | 1.091 (0.761–1.564)   | 0.636   | 1.487 (0.900–2.457)   | 0.122        |
| AFP (ng/ml) (>400 vs. ≤400)                                    | 279       | 1.075 (0.658–1.759)   | 0.772   | 0.729 (0.404–1.316)   | 0.294        |
| CDK4 (High vs. Low)                                            | 373       | 1.921 (1.350–2.733)   | <0.001  | 1.890 (1.121–3.187)   | <b>0.017</b> |

**Supplementary Table 6. Univariate and multivariate analysis of CDK4 associated with PFS of HCC.**

| Characteristics                                                | Total (N) | Univariate analysis   |         | Multivariate analysis |              |
|----------------------------------------------------------------|-----------|-----------------------|---------|-----------------------|--------------|
|                                                                |           | Hazard ratio (95% CI) | P value | Hazard ratio (95% CI) | P value      |
| T stage (T2 & T3 & T4 vs. T1)                                  | 370       | 2.360 (1.745–3.191)   | <0.001  | 0.470 (0.061–3.605)   | 0.467        |
| Pathologic stage (Stage II & Stage III & Stage IV vs. Stage I) | 349       | 2.284 (1.670–3.122)   | <0.001  | 4.121 (0.536–31.713)  | 0.174        |
| Age (>60 vs. ≤60)                                              | 373       | 0.960 (0.718–1.284)   | 0.783   | 1.042 (0.725–1.498)   | 0.823        |
| BMI (>25 vs. ≤25)                                              | 336       | 0.936 (0.689–1.272)   | 0.673   | 1.085 (0.748–1.574)   | 0.665        |
| Histologic grade (G3 & G4 vs. G1 & G2)                         | 368       | 1.152 (0.853–1.557)   | 0.355   | 1.006 (0.690–1.465)   | 0.976        |
| AFP (ng/ml) (>400 vs. ≤400)                                    | 279       | 1.045 (0.698–1.563)   | 0.832   | 0.775 (0.496–1.211)   | 0.263        |
| CDK4 (High vs. Low)                                            | 373       | 1.807 (1.348–2.424)   | <0.001  | 1.868 (1.277–2.733)   | <b>0.001</b> |

**Supplementary Table 7. Univariate and multivariate analysis of BAX associated with DSS of HCC.**

| Characteristics                                                | Total (N) | Univariate analysis   |         | Multivariate analysis |         |
|----------------------------------------------------------------|-----------|-----------------------|---------|-----------------------|---------|
|                                                                |           | Hazard ratio (95% CI) | P value | Hazard ratio (95% CI) | P value |
| T stage (T2 & T3 & T4 vs. T1)                                  | 362       | 2.829 (1.747–4.582)   | <0.001  | 0.213 (0.025–1.856)   | 0.162   |
| Pathologic stage (Stage II & Stage III & Stage IV vs. Stage I) | 341       | 2.909 (1.718–4.925)   | <0.001  | 9.104 (0.996–83.209)  | 0.050   |
| Age (>60 vs. ≤60)                                              | 365       | 0.846 (0.543–1.317)   | 0.458   | 1.013 (0.548–1.872)   | 0.968   |
| BMI (>25 vs. ≤25)                                              | 329       | 0.826 (0.512–1.330)   | 0.431   | 1.366 (0.730–2.558)   | 0.329   |
| Histologic grade (G3 & G4 vs. G1 & G2)                         | 360       | 1.086 (0.683–1.728)   | 0.726   | 1.482 (0.782–2.809)   | 0.228   |
| AFP (ng/ml) (>400 vs. ≤400)                                    | 275       | 0.867 (0.450–1.668)   | 0.668   | 0.661 (0.305–1.433)   | 0.294   |
| BAX (High vs. Low)                                             | 365       | 1.378 (0.885–2.144)   | 0.156   | 1.185 (0.625–2.248)   | 0.604   |

**Supplementary Table 8. Univariate and multivariate analysis of BAX associated with OS of HCC.**

| Characteristics                                                | Total (N) | Univariate analysis   |              | Multivariate analysis |         |
|----------------------------------------------------------------|-----------|-----------------------|--------------|-----------------------|---------|
|                                                                |           | Hazard ratio (95% CI) | P value      | Hazard ratio (95% CI) | P value |
| T stage (T2 & T3 & T4 vs. T1)                                  | 370       | 2.126 (1.481–3.052)   | <0.001       | 0.448 (0.056–3.568)   | 0.448   |
| Pathologic stage (Stage II & Stage III & Stage IV vs. Stage I) | 349       | 2.090 (1.429–3.055)   | <0.001       | 3.566 (0.437–29.074)  | 0.235   |
| Age (>60 vs. ≤60)                                              | 373       | 1.205 (0.850–1.708)   | 0.295        | 1.619 (0.997–2.631)   | 0.052   |
| BMI (>25 vs. ≤25)                                              | 336       | 0.798 (0.550–1.158)   | 0.235        | 1.163 (0.717–1.887)   | 0.541   |
| Histologic grade (G3 & G4 vs. G1 & G2)                         | 368       | 1.091 (0.761–1.564)   | 0.636        | 1.612 (0.984–2.640)   | 0.058   |
| AFP (ng/ml) (>400 vs. ≤400)                                    | 279       | 1.075 (0.658–1.759)   | 0.772        | 0.863 (0.490–1.519)   | 0.609   |
| BAX (High vs. Low)                                             | 373       | 1.475 (1.043–2.085)   | <b>0.028</b> | 1.401 (0.855–2.297)   | 0.181   |

**Supplementary Table 9. Univariate and multivariate analysis of BAX associated with PFS of HCC.**

| Characteristics                                                | Total (N) | Univariate analysis   |         | Multivariate analysis |         |
|----------------------------------------------------------------|-----------|-----------------------|---------|-----------------------|---------|
|                                                                |           | Hazard ratio (95% CI) | P value | Hazard ratio (95% CI) | P value |
| T stage (T2 & T3 & T4 vs. T1)                                  | 370       | 2.360 (1.745–3.191)   | <0.001  | 0.349 (0.045–2.694)   | 0.313   |
| Pathologic stage (Stage II & Stage III & Stage IV vs. Stage I) | 349       | 2.284 (1.670–3.122)   | <0.001  | 5.215 (0.670–40.561)  | 0.115   |
| Age (>60 vs. ≤60)                                              | 373       | 0.960 (0.718–1.284)   | 0.783   | 1.005 (0.700–1.443)   | 0.979   |
| BMI (>25 vs. ≤25)                                              | 336       | 0.936 (0.689–1.272)   | 0.673   | 1.075 (0.742–1.558)   | 0.701   |
| Histologic grade (G3 & G4 vs. G1 & G2)                         | 368       | 1.152 (0.853–1.557)   | 0.355   | 1.140 (0.781–1.664)   | 0.496   |
| AFP (ng/ml) (>400 vs. ≤400)                                    | 279       | 1.045 (0.698–1.563)   | 0.832   | 0.940 (0.605–1.459)   | 0.781   |
| BAX (High vs. Low)                                             | 373       | 1.295 (0.969–1.732)   | 0.081   | 0.950 (0.656–1.377)   | 0.788   |

**Supplementary Table 10. Univariate and multivariate analysis of SMARCD1 associated with DSS of HCC.**

| Characteristics                                                | Total (N) | Univariate analysis   |              | Multivariate analysis |              |
|----------------------------------------------------------------|-----------|-----------------------|--------------|-----------------------|--------------|
|                                                                |           | Hazard ratio (95% CI) | P value      | Hazard ratio (95% CI) | P value      |
| T stage (T2 & T3 & T4 vs. T1)                                  | 362       | 2.829 (1.747–4.582)   | <0.001       | 0.275 (0.032–2.364)   | 0.239        |
| Pathologic stage (Stage II & Stage III & Stage IV vs. Stage I) | 341       | 2.909 (1.718–4.925)   | <0.001       | 7.083 (0.788–63.667)  | 0.081        |
| Age (>60 vs. ≤60)                                              | 365       | 0.846 (0.543–1.317)   | 0.458        | 1.006 (0.543–1.863)   | 0.985        |
| BMI (>25 vs. ≤25)                                              | 329       | 0.826 (0.512–1.330)   | 0.431        | 1.380 (0.738–2.580)   | 0.313        |
| Histologic grade (G3 & G4 vs. G1 & G2)                         | 360       | 1.086 (0.683–1.728)   | 0.726        | 1.184 (0.613–2.289)   | 0.615        |
| AFP (ng/ml) (>400 vs. ≤400)                                    | 275       | 0.867 (0.450–1.668)   | 0.668        | 0.522 (0.235–1.159)   | 0.110        |
| SMARCD1 (High vs. Low)                                         | 365       | 2.050 (1.303–3.225)   | <b>0.002</b> | 2.400 (1.216–4.740)   | <b>0.012</b> |

**Supplementary Table 11. Univariate and multivariate analysis of SMARCD1 associated with OS of HCC.**

| Characteristics                                                | Total (N) | Univariate analysis   |         | Multivariate analysis |              |
|----------------------------------------------------------------|-----------|-----------------------|---------|-----------------------|--------------|
|                                                                |           | Hazard ratio (95% CI) | P value | Hazard ratio (95% CI) | P value      |
| T stage (T2 & T3 & T4 vs. T1)                                  | 370       | 2.126 (1.481–3.052)   | <0.001  | 0.499 (0.063–3.959)   | 0.511        |
| Pathologic stage (Stage II & Stage III & Stage IV vs. Stage I) | 349       | 2.090 (1.429–3.055)   | <0.001  | 3.241 (0.399–26.351)  | 0.271        |
| Age (>60 vs. ≤60)                                              | 373       | 1.205 (0.850–1.708)   | 0.295   | 1.603 (0.984–2.613)   | 0.058        |
| BMI (>25 vs. ≤25)                                              | 336       | 0.798 (0.550–1.158)   | 0.235   | 1.130 (0.698–1.829)   | 0.620        |
| Histologic grade (G3 & G4 vs. G1 & G2)                         | 368       | 1.091 (0.761–1.564)   | 0.636   | 1.450 (0.876–2.402)   | 0.149        |
| AFP (ng/ml) (>400 vs. ≤400)                                    | 279       | 1.075 (0.658–1.759)   | 0.772   | 0.797 (0.450–1.411)   | 0.436        |
| SMARCD1 (High vs. Low)                                         | 373       | 1.934 (1.360–2.750)   | <0.001  | 1.818 (1.086–3.042)   | <b>0.023</b> |

**Supplementary Table 12. Univariate and multivariate analysis of SMARCD1 associated with PFS of HCC.**

| Characteristics                                                | Total (N) | Univariate analysis   |              | Multivariate analysis |         |
|----------------------------------------------------------------|-----------|-----------------------|--------------|-----------------------|---------|
|                                                                |           | Hazard ratio (95% CI) | P value      | Hazard ratio (95% CI) | P value |
| T stage (T2 & T3 & T4 vs. T1)                                  | 370       | 2.360 (1.745–3.191)   | <0.001       | 0.398 (0.052–3.061)   | 0.376   |
| Pathologic stage (Stage II & Stage III & Stage IV vs. Stage I) | 349       | 2.284 (1.670–3.122)   | <0.001       | 4.525 (0.585–35.001)  | 0.148   |
| Age (>60 vs. ≤60)                                              | 373       | 0.960 (0.718–1.284)   | 0.783        | 0.997 (0.694–1.433)   | 0.989   |
| BMI (>25 vs. ≤25)                                              | 336       | 0.936 (0.689–1.272)   | 0.673        | 1.083 (0.748–1.567)   | 0.674   |
| Histologic grade (G3 & G4 vs. G1 & G2)                         | 368       | 1.152 (0.853–1.557)   | 0.355        | 1.066 (0.730–1.555)   | 0.742   |
| AFP (ng/ml) (>400 vs. ≤400)                                    | 279       | 1.045 (0.698–1.563)   | 0.832        | 0.871 (0.557–1.360)   | 0.542   |
| SMARCD1 (High vs. Low)                                         | 373       | 1.471 (1.100–1.968)   | <b>0.009</b> | 1.299 (0.890–1.894)   | 0.175   |

**Supplementary Table 13. Univariate and multivariate analysis of SMARCB1 associated with DSS of HCC.**

| Characteristics                                                | Total (N) | Univariate analysis   |              | Multivariate analysis |              |
|----------------------------------------------------------------|-----------|-----------------------|--------------|-----------------------|--------------|
|                                                                |           | Hazard ratio (95% CI) | P value      | Hazard ratio (95% CI) | P value      |
| T stage (T2 & T3 & T4 vs. T1)                                  | 362       | 2.829 (1.747–4.582)   | <0.001       | 0.203 (0.023–1.760)   | 0.148        |
| Pathologic stage (Stage II & Stage III & Stage IV vs. Stage I) | 341       | 2.909 (1.718–4.925)   | <0.001       | 9.798 (1.088–88.236)  | <b>0.042</b> |
| Age (>60 vs. ≤60)                                              | 365       | 0.846 (0.543–1.317)   | 0.458        | 0.998 (0.540–1.844)   | 0.994        |
| BMI (>25 vs. ≤25)                                              | 329       | 0.826 (0.512–1.330)   | 0.431        | 1.355 (0.724–2.535)   | 0.343        |
| Histologic grade (G3 & G4 vs. G1 & G2)                         | 360       | 1.086 (0.683–1.728)   | 0.726        | 1.513 (0.797–2.869)   | 0.205        |
| AFP (ng/ml) (>400 vs. ≤400)                                    | 275       | 0.867 (0.450–1.668)   | 0.668        | 0.673 (0.301–1.505)   | 0.335        |
| SMARCB1 (High vs. Low)                                         | 365       | 1.671 (1.068–2.615)   | <b>0.025</b> | 1.053 (0.541–2.050)   | 0.880        |

**Supplementary Table 14. Univariate and multivariate analysis of SMARCB1 associated with OS of HCC.**

| Characteristics                                                | Total (N) | Univariate analysis   |              | Multivariate analysis |              |
|----------------------------------------------------------------|-----------|-----------------------|--------------|-----------------------|--------------|
|                                                                |           | Hazard ratio (95% CI) | P value      | Hazard ratio (95% CI) | P value      |
| T stage (T2 & T3 & T4 vs. T1)                                  | 370       | 2.126 (1.481–3.052)   | <0.001       | 0.380 (0.048–3.034)   | 0.362        |
| Pathologic stage (Stage II & Stage III & Stage IV vs. Stage I) | 349       | 2.090 (1.429–3.055)   | <0.001       | 4.264 (0.525–34.630)  | 0.175        |
| Age (>60 vs. ≤60)                                              | 373       | 1.205 (0.850–1.708)   | 0.295        | 1.600 (0.984–2.601)   | 0.058        |
| BMI (>25 vs. ≤25)                                              | 336       | 0.798 (0.550–1.158)   | 0.235        | 1.137 (0.702–1.842)   | 0.602        |
| Histologic grade (G3 & G4 vs. G1 & G2)                         | 368       | 1.091 (0.761–1.564)   | 0.636        | 1.722 (1.042–2.845)   | <b>0.034</b> |
| AFP (ng/ml) (>400 vs. ≤400)                                    | 279       | 1.075 (0.658–1.759)   | 0.772        | 0.946 (0.523–1.710)   | 0.854        |
| SMARCB1 (High vs. Low)                                         | 373       | 1.489 (1.053–2.107)   | <b>0.024</b> | 0.945 (0.561–1.591)   | 0.831        |

**Supplementary Table 15. Univariate and multivariate analysis of SMARCB1 associated with PFI of HCC.**

| Characteristics                                                | Total (N) | Univariate analysis   |         | Multivariate analysis |         |
|----------------------------------------------------------------|-----------|-----------------------|---------|-----------------------|---------|
|                                                                |           | Hazard ratio (95% CI) | P value | Hazard ratio (95% CI) | P value |
| T stage (T2 & T3 & T4 vs. T1)                                  | 370       | 2.360 (1.745–3.191)   | <0.001  | 0.378 (0.049–2.913)   | 0.350   |
| Pathologic stage (Stage II & Stage III & Stage IV vs. Stage I) | 349       | 2.284 (1.670–3.122)   | <0.001  | 4.855 (0.628–37.513)  | 0.130   |
| Age (>60 vs. ≤60)                                              | 373       | 0.960 (0.718–1.284)   | 0.783   | 1.009 (0.702–1.450)   | 0.962   |
| BMI (>25 vs. ≤25)                                              | 336       | 0.936 (0.689–1.272)   | 0.673   | 1.083 (0.747–1.570)   | 0.673   |
| Histologic grade (G3 & G4 vs. G1 & G2)                         | 368       | 1.152 (0.853–1.557)   | 0.355   | 1.105 (0.759–1.608)   | 0.603   |
| AFP (ng/ml) (>400 vs. ≤400)                                    | 279       | 1.045 (0.698–1.563)   | 0.832   | 0.894 (0.568–1.408)   | 0.630   |
| SMARCB1 (High vs. Low)                                         | 373       | 1.288 (0.963–1.723)   | 0.088   | 1.131 (0.771–1.660)   | 0.530   |

**Supplementary Table 16. Correlation between TRIM28 expression and clinicopathological characteristics of HCCs.**

| Clinicopathological variables | TRIM28 expression |               | P value                 |
|-------------------------------|-------------------|---------------|-------------------------|
|                               | Negative          | Positive      |                         |
|                               | (n = 46)          | (n = 43)      |                         |
| Age                           | 52.46 ± 11.49     | 52.30 ± 10.19 | 0.947                   |
| Sex                           | Female            | 4             | 0.734 <sup>fisher</sup> |
|                               | Male              | 42            |                         |
| Serum AFP                     | ≤20 ng/ml         | 19            | 0.865 <sup>chisq</sup>  |
|                               | >20 ng/ml         | 27            |                         |
| Virus infection (HBV)         | HBsAg             | 10            | 0.926 <sup>chisq</sup>  |
|                               | None              | 36            |                         |
| Cirrhosis                     | Absent            | 5             | 1.000 <sup>fisher</sup> |
|                               | Present           | 41            |                         |
| Tumor number                  | Single            | 40            | 0.741 <sup>fisher</sup> |
|                               | Multiple          | 6             |                         |
| Maximal tumor size            | ≤5cm              | 34            | 0.367 <sup>chisq</sup>  |
|                               | >5cm              | 12            |                         |
| Tumor encapsulation           | Absent            | 21            | 0.162 <sup>chisq</sup>  |
|                               | Present           | 25            |                         |
| Pathology class               | I–II              | 27            | 0.025 <sup>chisq*</sup> |
|                               | III               | 19            |                         |
| AJCC                          | I                 | 37            | 0.038 <sup>chisq*</sup> |
|                               | II–III            | 9             |                         |
| TNM stage                     | I                 | 37            | 0.038 <sup>chisq*</sup> |
|                               | II–III            | 9             |                         |

Abbreviations: fisher: fisher exact test; chisq: chi-square test; \**p* < 0.05.

**Supplementary Table 17. Correlation between H2AX expression and clinicopathological characteristics of HCCs.**

| Clinicopathological variables | H2AX expression |            | P value                 |
|-------------------------------|-----------------|------------|-------------------------|
|                               | Negative        | Positive   |                         |
|                               | (n = 58)        | (n = 31)   |                         |
| Age                           | 52.40 ± 11.83   | 52.35±8.80 | 0.776                   |
| Sex                           | Female          | 5          | 0.714 <sup>fisher</sup> |
|                               | Male            | 53         |                         |
| Serum AFP                     | ≤20 ng/ml       | 26         | 0.250 <sup>chisq</sup>  |
|                               | >20 ng/ml       | 32         |                         |
| Virus infection (HBV)         | HBsAg           | 43         | 0.155 <sup>chisq</sup>  |
|                               | None            | 15         |                         |
| Cirrhosis                     | Absent          | 8          | 0.154 <sup>fisher</sup> |
|                               | Present         | 50         |                         |
| Tumor number                  | Single          | 54         | 0.090 <sup>fisher</sup> |
|                               | Multiple        | 4          |                         |
| Maximal tumor size            | ≤5cm            | 38         | 0.245 <sup>chisq</sup>  |
|                               | >5cm            | 20         |                         |
| Tumor encapsulation           | Absent          | 30         | 0.779 <sup>chisq</sup>  |
|                               | Present         | 28         |                         |
| Pathology class               | I–II            | 32         | 0.039 <sup>chisq*</sup> |
|                               | III             | 26         |                         |
| AJCC                          | I               | 46         | 0.016 <sup>chisq*</sup> |
|                               | II–III          | 12         |                         |
| TNM stage                     | I               | 46         | 0.016 <sup>chisq*</sup> |
|                               | II–III          | 12         |                         |

Abbreviations: fisher: fisher exact test; chisq: chi-square test; \**p* < 0.05.

**Supplementary Table 18. Correlation between CDK4 expression and clinicopathological characteristics of HCCs.**

| Clinicopathological variables | CDK4 expression |             | P value                 |
|-------------------------------|-----------------|-------------|-------------------------|
|                               | Negative        | Positive    |                         |
|                               | (n = 46)        | (n = 43)    |                         |
| Age                           | 53.22±11.56     | 51.49±10.03 | 0.454                   |
| Sex                           | Female          | 4           | 0.734 <sup>fisher</sup> |
|                               | Male            | 42          |                         |
| Serum AFP                     | ≤20 ng/ml       | 24          | 0.020 <sup>chisq*</sup> |
|                               | >20 ng/ml       | 22          |                         |
| Virus infection (HBV)         | HBsAg           | 37          | 0.671 <sup>chisq</sup>  |
|                               | None            | 9           |                         |
| Cirrhosis                     | Absent          | 4           | 0.734 <sup>fisher</sup> |
|                               | Present         | 42          |                         |
| Tumor number                  | Single          | 43          | 0.188 <sup>fisher</sup> |
|                               | Multiple        | 3           |                         |
| Maximal tumor size            | ≤5cm            | 33          | 0.085 <sup>chisq</sup>  |
|                               | >5cm            | 13          |                         |
| Tumor encapsulation           | Absent          | 20          | 0.068 <sup>chisq</sup>  |
|                               | Present         | 26          |                         |
| Pathology class               | I–II            | 27          | 0.025 <sup>chisq*</sup> |
|                               | III             | 19          |                         |
| AJCC                          | I               | 38          | 0.011 <sup>chisq*</sup> |
|                               | II–III          | 8           |                         |
| TNM stage                     | I               | 38          | 0.011 <sup>chisq*</sup> |
|                               | II–III          | 8           |                         |

Abbreviations: fisher: fisher exact test; chisq: chi-square test; \**p* < 0.05.

**Supplementary Table 19. Univariate and multivariate analysis of factors with OS of 83 HCCs.**

|                                          | Survival            |              |         |              |              |         |
|------------------------------------------|---------------------|--------------|---------|--------------|--------------|---------|
|                                          | Univariate analysis |              |         | Multivariate |              |         |
|                                          | HR                  | 95% CI       | P value | HR           | 95% CI       | P value |
| Age                                      | 0.999               | 0.964–1.035  | 0.949   |              |              |         |
| Sex (female vs. male)                    | 0.000               | 0.000–Inf    | 0.997   |              |              |         |
| Serum AFP (≤20 vs. >20 ng/ml)            | 1.837               | 0.767–4.400  | 0.172   |              |              |         |
| HBV infection (no vs. yes)               | 1.083               | 0.406–2.887  | 0.874   |              |              |         |
| Cirrhosis (absent or present)            | 1.364               | 0.322–5.786  | 0.674   |              |              |         |
| Tumor number (single vs. multiple)       | 1.251               | 0.374–4.181  | 0.716   |              |              |         |
| Maximal tumor size (≤5 vs. >5 cm)        | 1.301               | 0.575–2.946  | 0.527   |              |              |         |
| Tumor encapsulation (absent vs. present) | 1.473               | 0.668–3.247  | 0.337   |              |              |         |
| TNM stage (II–III vs. I)                 | 2.812               | 1.279–6.183  | 0.010*  | 4.061        | 0.942–17.514 | 0.060   |
| Pathology class (III vs. I–II)           | 2.819               | 1.177–6.752  | 0.020*  | 1.083        | 0.373–3.125  | 0.883   |
| AJCC (II–III vs. I)                      | 2.019               | 0.905–4.506  | 0.086   |              |              |         |
| TRIM28 (positive vs. negative)           | 6.487               | 2.220–18.953 | <0.001  | 2.310        | 0.616–8.665  | 0.124   |
| H2AX (positive vs. negative)             | 2.492               | 1.130–5.493  | 0.024*  | 1.361        | 0.497–3.724  | 0.548   |
| CDK4 (positive vs. negative)             | 7.313               | 2.504–21.355 | <0.001  | 3.995        | 1.119–14.261 | 0.033*  |

\**P* < 0.05.

**Supplementary Table 20. Univariate and multivariate analysis of factors with PFS of 83 HCCs.**

|                                            | Survival            |              |          |              |              |         |
|--------------------------------------------|---------------------|--------------|----------|--------------|--------------|---------|
|                                            | Univariate analysis |              |          | Multivariate |              |         |
|                                            | HR                  | 95% CI       | P value  | HR           | 95% CI       | P value |
| Age                                        | 1.001               | 0.966–1.038  | 0.945    |              |              |         |
| Sex (female vs. male)                      | 0.337               | 0.046–2.483  | 0.286    |              |              |         |
| Serum AFP ( $\leq 20$ vs. $>20$ ng/ml)     | 1.860               | 0.819–4.224  | 0.138    |              |              |         |
| HBV infection (no vs. yes)                 | 1.027               | 0.416–2.534  | 0.954    |              |              |         |
| Cirrhosis (absent or present)              | 1.585               | 0.376–6.681  | 0.530    |              |              |         |
| Tumor number (single vs. multiple)         | 1.090               | 0.329–3.610  | 0.888    |              |              |         |
| Maximal tumor size ( $\leq 5$ vs. $>5$ cm) | 1.066               | 0.482–2.356  | 0.875    |              |              |         |
| Tumor encapsulation (absent vs. present)   | 1.476               | 0.698–3.120  | 0.309    |              |              |         |
| TNM stage (II–III vs. I)                   | 2.723               | 1.292–5.716  | 0.008**  | 1.520        | 0.522–4.424  | 0.442   |
| Pathology class (III vs. I–II)             | 2.520               | 1.110–5.725  | 0.027*   | 0.888        | 0.295–2.672  | 0.833   |
| AJCC (II–III vs. I)                        | 1.656               | 0.776–3.537  | 0.192    |              |              |         |
| TRIM28 (positive vs. negative)             | 2.282               | 1.052–4.951  | 0.037*   | 0.702        | 0.261–1.888  | 0.483   |
| H2AX (positive vs. negative)               | 2.360               | 1.122–4.967  | 0.024*   | 1.734        | 0.708–4.246  | 0.228   |
| CDK4 (positive vs. negative)               | 5.545               | 2.224–13.702 | $<0.001$ | 4.933        | 1.290–18.867 | 0.020*  |

\* $P < 0.05$ , \*\* $P < 0.01$ .
